# Supplementary material
Source: publisher figshare collection journal article supplement (https://gsajournals.figshare.com/articles/dataset/_/6406598)
Supplement: Supplementary file 1 [file 1]

**Table S1.** Yeast strains used in this study.

| Strain              | Relevant genotype                                                                                                       | Genetic background | Description                                  | Source                       |
|---------------------|-------------------------------------------------------------------------------------------------------------------------|--------------------|----------------------------------------------|------------------------------|
| <b>Diploids:</b>    |                                                                                                                         |                    |                                              |                              |
| JAY270              | <i>MATa/MAT<math>\alpha</math>, ACE2/ace2-A7</i>                                                                        | JAY270             | single colony isolate from PE-2 strain stock | Argueso <i>et al.</i> , 2009 |
| JAY663              | <i>MATa/MAT<math>\alpha</math>, ace2-A7/ace2-A7</i>                                                                     | JAY270             | Spontaneous rough colony isolate             | This study                   |
| JAY664              | <i>MATa/MAT<math>\alpha</math>, ace2-A7/ace2-A7</i>                                                                     | JAY270             | Spontaneous rough colony isolate             | This study                   |
| JAY665              | <i>MATa/MAT<math>\alpha</math>, ace2-A7/ace2-A7</i>                                                                     | JAY270             | Spontaneous rough colony isolate             | This study                   |
| JAY912              | <i>MATa/MAT<math>\alpha</math>, ace2-A7/ace2-A7</i>                                                                     | JAY270             | Spontaneous rough colony isolate             | This study                   |
| JAY913              | <i>MATa/MAT<math>\alpha</math>, ace2-A7/ace2-A7</i>                                                                     | JAY270             | Spontaneous rough colony isolate             | This study                   |
| JAY585 (FGY50)      | <i>MATa/MAT<math>\alpha</math>, ACE2/ace2-A7, ura3<math>\Delta</math>0/ura3<math>\Delta</math>0</i>                     | JAY270             | Ura <sup>-</sup> derivative of JAY270        | Argueso strain collection    |
| JAY1101, 1102, 1103 | <i>MATa/MAT<math>\alpha</math>, ACE2::CORE2/ace2-A7, ura3<math>\Delta</math>0/ura3<math>\Delta</math>0</i>              | JAY270             | Hemizygous CORE2 insertion at Chr12-P        | This study                   |
| JAY1099, 1100, 1104 | <i>MATa/MAT<math>\alpha</math>, ACE2/ace2-A7::CORE2, ura3<math>\Delta</math>0/ura3<math>\Delta</math>0</i>              | JAY270             | Hemizygous CORE2 insertion at Chr12-M        | This study                   |
| JAY865, 866         | <i>MATa/MAT<math>\alpha</math>, ACE2/ace2-A7, ura3<math>\Delta</math>0/ura3<math>\Delta</math>0, SSF2::CORE2/SSF2</i>   | JAY270             | Hemizygous CORE2 insertion at Chr4           | This study                   |
| JAY867              | <i>MATa/MAT<math>\alpha</math>, ACE2/ace2-A7, ura3<math>\Delta</math>0/ura3<math>\Delta</math>0, MAL13::CORE2/MAL13</i> | JAY270             | Hemizygous CORE2 insertion at Chr7           | This study                   |
| JAY868              | <i>MATa/MAT<math>\alpha</math>, ACE2/ace2-A7, ura3<math>\Delta</math>0/ura3<math>\Delta</math>0, ADH6::CORE2/ADH6</i>   | JAY270             | Hemizygous CORE2 insertion at Chr13          | This study                   |
| JAY859, 860         | <i>MATa/MAT<math>\alpha</math>, ACE2/ACE2, ura3<math>\Delta</math>0/ura3<math>\Delta</math>0, ADH6::CORE2/ADH6</i>      | CG379*             | Hemizygous CORE2 insertion at Chr13          | This study                   |
| JAY861, 862         | <i>MATa/MAT<math>\alpha</math>, ACE2/ACE2, ura3<math>\Delta</math>0/ura3<math>\Delta</math>0, SSF2::CORE2/SSF2</i>      | CG379*             | Hemizygous CORE2 insertion at Chr4           | This study                   |
| JAY863, 864         | <i>MATa/MAT<math>\alpha</math>, ACE2/ACE2, ura3<math>\Delta</math>0/ura3<math>\Delta</math>0, MAL13::CORE2/MAL13</i>    | CG379*             | Hemizygous CORE2 insertion at Chr7           | This study                   |
| JAY1105,1106        | <i>MATa/MAT<math>\alpha</math>, ACE2::CORE2/ACE2, ura3<math>\Delta</math>0/ura3<math>\Delta</math>0</i>                 | CG379*             | Hemizygous CORE2 insertion at Chr12          | This study                   |

**Table S1 (continued).** Yeast strains used in this study.

| Strain           | Relevant genotype                                           | Genetic background | Description                         | Source                       |
|------------------|-------------------------------------------------------------|--------------------|-------------------------------------|------------------------------|
| <b>Haploids:</b> |                                                             |                    |                                     |                              |
| JAY289           | <i>MATa, ACE2</i>                                           | JAY270             | Sibling spores from a JAY270 tetrad | Argueso <i>et al.</i> , 2009 |
| JAY290           | <i>MAT<math>\alpha</math>, ACE2</i>                         | JAY270             |                                     |                              |
| JAY291           | <i>MATa, ace2-A7</i>                                        | JAY270             |                                     |                              |
| JAY292           | <i>MAT<math>\alpha</math>, ace2-A7</i>                      | JAY270             |                                     |                              |
| JAY293           | <i>MAT<math>\alpha</math>, ACE2</i>                         | JAY270             | Sibling spores from a JAY270 tetrad | Argueso strain collection    |
| JAY294           | <i>MAT<math>\alpha</math>, ACE2</i>                         | JAY270             |                                     |                              |
| JAY295           | <i>MATa, ace2-A7</i>                                        | JAY270             |                                     |                              |
| JAY296           | <i>MATa, ace2-A7</i>                                        | JAY270             |                                     |                              |
| JAY325           | <i>MAT<math>\alpha</math>, ace2-A7</i>                      | JAY270             | Sibling spores from a JAY270 tetrad | Argueso strain collection    |
| JAY326           | <i>MATa, ace2-A7</i>                                        | JAY270             |                                     |                              |
| JAY327           | <i>MATa, ACE2</i>                                           | JAY270             |                                     |                              |
| JAY328           | <i>MAT<math>\alpha</math>, ACE2</i>                         | JAY270             |                                     |                              |
| JAY2176          | <i>MATa, ace2-A7</i>                                        | JAY270             | Sibling spores from a JAY663 tetrad | This study                   |
| JAY2177          | <i>MATa, ace2-A7</i>                                        | JAY270             |                                     |                              |
| JAY2178          | <i>MAT<math>\alpha</math>, ace2-A7</i>                      | JAY270             |                                     |                              |
| JAY2179          | <i>MAT<math>\alpha</math>, ace2-A7</i>                      | JAY270             |                                     |                              |
| JAY2180          | <i>MATa, ace2-A7</i>                                        | JAY270             | Sibling spores from a JAY663 tetrad | This study                   |
| JAY2181          | <i>MATa, ace2-A7</i>                                        | JAY270             |                                     |                              |
| JAY2182          | <i>MAT<math>\alpha</math>, ace2-A7</i>                      | JAY270             |                                     |                              |
| JAY2183          | <i>MAT<math>\alpha</math>, ace2-A7</i>                      | JAY270             |                                     |                              |
| JAY2184          | <i>MATa, ace2-A7</i>                                        | JAY270             | Sibling spores from a JAY663 tetrad | This study                   |
| JAY2185          | <i>MATa, ace2-A7</i>                                        | JAY270             |                                     |                              |
| JAY2186          | <i>MAT<math>\alpha</math>, ace2-A7</i>                      | JAY270             |                                     |                              |
| JAY2187          | <i>MAT<math>\alpha</math>, ace2-A7</i>                      | JAY270             |                                     |                              |
| JAY2176          | <i>MATa, ace2-A7</i>                                        | JAY270             | Sibling spores from a JAY663 tetrad | This study                   |
| JAY2177          | <i>MATa, ace2-A7</i>                                        | JAY270             |                                     |                              |
| JAY2178          | <i>MAT<math>\alpha</math>, ace2-A7</i>                      | JAY270             |                                     |                              |
| JAY2179          | <i>MAT<math>\alpha</math>, ace2-A7</i>                      | JAY270             |                                     |                              |
| JAY2180          | <i>MATa, ace2-A7</i>                                        | JAY270             | Sibling spores from a JAY663 tetrad | This study                   |
| JAY2181          | <i>MATa, ace2-A7</i>                                        | JAY270             |                                     |                              |
| JAY2182          | <i>MAT<math>\alpha</math>, ace2-A7</i>                      | JAY270             |                                     |                              |
| JAY2183          | <i>MAT<math>\alpha</math>, ace2-A7</i>                      | JAY270             |                                     |                              |
| JAY2184          | <i>MATa, ace2-A7</i>                                        | JAY270             | Sibling spores from a JAY663 tetrad | This study                   |
| JAY2185          | <i>MATa, ace2-A7</i>                                        | JAY270             |                                     |                              |
| JAY2186          | <i>MAT<math>\alpha</math>, ace2-A7</i>                      | JAY270             |                                     |                              |
| JAY2187          | <i>MAT<math>\alpha</math>, ace2-A7</i>                      | JAY270             |                                     |                              |
| JAY1039          | <i>MAT<math>\alpha</math>, ACE2, ura3-154, CEN5::HphMX4</i> | JAY270             | ACE2 allele replacement in JAY292   | This study                   |
| JAY1051          | <i>MATa, ACE2, ura3-W256G, CEN5::HphMX4</i>                 | JAY270             | ACE2 allele replacement in JAY291   | This study                   |

\* CG379 diploid strains are also homozygous for: *ade5-1, his7-2, leu2-3,112, Leu<sup>+</sup>, trp1-289, cup1 $\Delta$ , RSC30, sfa1 $\Delta$ ::hisG*.

**Table S2.** Oligonucleotides used in this study.

| Name    | 5'-3' sequence *                                                        | Description                                   |
|---------|-------------------------------------------------------------------------|-----------------------------------------------|
| JAO904  | ACACTCAAGATGAGGAGTAT                                                    | ACE2 primer Fwd, pAR1 construction            |
| JAO905  | TCGCATGAATACGGTCTATC                                                    | ACE2 primer Rev, pAR1 construction            |
| JAO906  | TACTTCAATAATGGTTCAC                                                     | ACE2 primer Fwd, sequencing of A8/A7 tract    |
| JAO907  | TGATATTGTCGAGACCGTGG                                                    | ACE2 primer Rev, sequencing of A8/A7 tract    |
| JAO912  | TAGCACAAGATATGAACT                                                      | Chr12 409,200 distal SNP sequencing Fwd       |
| JAO913  | TATATCATCTACAATGAC                                                      | Chr12 409,200 distal SNP sequencing Rev       |
| JAO944  | ATACTGGAGAGTGTGGG                                                       | Chr12 400,451 proximal SNP sequencing Fwd     |
| JAO945  | TCTAGCGACCAATGGCC                                                       | Chr12 400,451 proximal SNP sequencing Rev     |
| JAO1077 | CCATTCTTTATCCGCATTC                                                     | Chr12 14,795 SNP HhaI RFLP Fwd                |
| JAO1078 | CACCTTGCTACGCTCCTTA                                                     | Chr12 14,795 SNP HhaI RFLP Rev                |
| JAO1079 | GCCTCGTCACAGTTTTTT                                                      | Chr12 85,625 SNP HhaI RFLP Fwd                |
| JAO1080 | CGTTTGGATTGCCCCTT                                                       | Chr12 85,625 SNP HhaI RFLP Rev                |
| JAO1081 | TCCTCGCTGTTTCGTTTT                                                      | Chr12 148,252 SNP Apol RFLP Fwd               |
| JAO1082 | AGGGGTACTGGTATTGTC                                                      | Chr12 148,252 SNP Apol RFLP Rev               |
| JAO1083 | CGGAATGAGACACTGTTA                                                      | Chr12 227,328 SNP HinfI RFLP Fwd              |
| JAO1084 | GTTGAAGTGAAGAAGGA                                                       | Chr12 227,328 SNP HinfI RFLP Rev              |
| JAO1085 | CGACAAACCGTGGTACAA                                                      | Chr12 292,284 SNP XbaI RFLP Fwd               |
| JAO1086 | CGAACATTCTACTCCAT                                                       | Chr12 292,284 SNP XbaI RFLP Rev               |
| JAO1087 | CACAGTCAAGAGAAAGAACA                                                    | Chr12 364,388 SNP HhaI RFLP Fwd               |
| JAO1088 | GCACACACAAAAGGAACTAA                                                    | Chr12 364,388 SNP HhaI RFLP Rev               |
| JAO1089 | CACTGAACACCAACATCT                                                      | Chr12 392,257 SNP HhaI RFLP Fwd               |
| JAO1090 | TCCTCAACAAGCAAGCAA                                                      | Chr12 392,257 SNP HhaI RFLP Rev               |
| JAO1091 | CCTACGTAAAAGATGACC                                                      | Chr12 419,261 SNP HhaI RFLP Fwd               |
| JAO1092 | CATTACCGCAACAGATCC                                                      | Chr12 419,261 SNP HhaI RFLP Rev               |
| JAO1093 | CGTGTGGATGATCTGATT                                                      | Chr12 450,044 SNP Apol RFLP Fwd               |
| JAO1094 | GAAAAGAAATGACTACGGTG                                                    | Chr12 450,044 SNP Apol RFLP Rev               |
| JAO14   | AGGAGGGTATTCTGGGCTCCATG                                                 | Inside Mx4 region Fwd                         |
| JAO15   | ATGCGAAGTTAAGTGCGCAGAAAG                                                | Inside Mx4 region Rev                         |
| JAO1073 | GGGCAATGTACCCATAAGGTTGTG                                                | Proximal of ACE2::CORE2 insertion Fwd         |
| JAO1074 | CTTTAGGGTTATGTCCCTATAAAGCATGACTATTGCCTTTTTTGGCCCTTAAGACTACAGTGACGTAAATC | Insertion of CORE2 proximal of ACE2 Fwd       |
| JAO1075 | GAACATTATGCTATGCATGATATTAACATAATAAATAATAGTAACAATAATATAATACATTATTCTTTAC  | Insertion of CORE2 proximal of ACE2 Rev       |
| JAO957  | AGCGTACCAAAAGAGAAT                                                      | Inside KIURA3 Fwd                             |
| JAO1076 | GATCAACAAGAACTTACATCTCCC                                                | Distal of ACE2::CORE2 insertion Rev           |
| JAO501  | GTCCGATACCCATGAACGTG                                                    | Proximal of ADH6::CORE2 insertion Fwd         |
| JAO502  | TTGTTAGTGTATTGATATGTGTTTCTTTTACCTTAAAGGTGCTTAGCAAGGAG                   | Insertion of CORE2 proximal of Chr13 ADH6 Fwd |
| JAO503  | TTTTTATGATTATAAGGTACTATTTAAATATTTACAACCTCGTACAGTTCTC                    | Insertion of CORE2 proximal of Chr13 ADH6 Rev |
| JAO504  | GGTCTGTATATAGGAGTGCTG                                                   | Distal of ADH6::CORE2 insertion Rev           |
| JAO505  | GTGACTTATTCAGTGAAGTAG                                                   | Proximal of SSF2::CORE2 insertion Fwd         |
| JAO506  | CCTCCGTACGTAACATCACTATCCATATAGTAGCCATGACTCCGATGGAC                      | Insertion of CORE2 distal of Chr4 SSF2 Fwd    |
| JAO507  | TTGAGGTGTTCCCTCACCTATGAATAAACAGACACTTCCTGGTTCTTTAA                      | Insertion of CORE2 distal of Chr4 SSF2 Rev    |
| JAO508  | TTTGTCTTTTCCATGATGCCG                                                   | Distal of SSF2::CORE2 insertion Rev           |
| JAO1442 | AAGAGGTCCGCTAATTCTGGAG                                                  | MAT locus Fwd                                 |
| JAO1371 | AGAACAAGAAGGATGCTAAG                                                    | MAT locus Rev                                 |
| JAO1761 | ATCCTACCATACCCCCACCC                                                    | Inside ACE2, Fwd, digital droplet PCR         |
| JAO1762 | CCCGTCTTAGGAGAAGGCAC                                                    | Inside ACE2, Rev, digital droplet PCR         |
| JAO1765 | AAGGAACTCTGTGGTGGTGC                                                    | Inside DNM1, Fwd, digital droplet PCR         |
| JAO1766 | TGTAGGACGGGGACCACTAG                                                    | Inside, DNM1, Rev, digital droplet PCR        |
| JAO1769 | GGGACCAAAACCAGACCAA                                                     | Inside YLR001C, Fwd, digital droplet PCR      |
| JAO1770 | TTGACAAAGCAATGGCGCTC                                                    | Inside YLR001C, Rev, digital droplet PCR      |

\* In the case of long oligonucleotides used for PCR-based integrations, the nucleotides in the 5' end (**bold**) are targeting tails with homology to the respective chromosomal insertion sites; the 3' end nucleotides (*italicized*) correspond to primer sequences used to amplify the selectable marker sequence from the specific template plasmids.

**Table S3.** List of phased JAY270 HetSNPs and hemizygous sequences and respective detection methods.

| Marker SGD coordinates |                    | PCR primers       | Polymorphism detection method | SGD Watson bases <sup>1</sup> | JAY270 Watson phased bases |          |
|------------------------|--------------------|-------------------|-------------------------------|-------------------------------|----------------------------|----------|
| Chromosome             | Nucleotide         |                   |                               |                               | Chr12-P                    | Chr12-M  |
| Chr12                  | 14,795             | JAO1077 + JAO1078 | <i>HhaI</i>                   | <u>C</u>                      | A                          | <u>C</u> |
| Chr12                  | 85,625             | JAO1079 + JAO1080 | <i>HhaI</i>                   | <u>G</u>                      | A                          | <u>G</u> |
| Chr12                  | 148,252            | JAO1081 + JAO1082 | <i>ApoI</i>                   | <u>A</u>                      | <u>A</u>                   | G        |
| Chr12                  | 227,328            | JAO1083 + JAO1084 | <i>HinfI</i>                  | <u>C</u>                      | T                          | <u>C</u> |
| Chr12                  | 292,284            | JAO1085 + JAO1086 | <i>XbaI</i>                   | I                             | C                          | I        |
| Chr12                  | 364,388            | JAO1087 + JAO1088 | <i>HhaI</i>                   | <u>G</u>                      | A                          | <u>G</u> |
| Chr12                  | 392,257            | JAO1089 + JAO1090 | <i>HhaI</i>                   | <u>G</u>                      | A                          | <u>G</u> |
| Chr12                  | 400,451            | JAO944 + JAO945   | Sanger seq                    | G                             | A                          | G        |
| Chr12                  | 405,711 to 405,718 | JAO906 + JAO907   | Sanger seq                    | 8x T                          | 8x T                       | 7x T     |
| Chr12                  | 409,200            | JAO912 + JAO913   | Sanger seq                    | C                             | T                          | C        |
| Chr12                  | 419,261            | JAO1091 + JAO1092 | <i>HhaI</i>                   | T                             | T                          | <u>C</u> |
| Chr12                  | 450,044            | JAO1093 + JAO1094 | <i>ApoI</i>                   | C                             | C                          | I        |

1. Nucleotides that are underlined indicate the sequences that are cut by the respective restriction endonucleases, whereas lack of underlining corresponds to no cut site.
