# Supplementary material
Source: publisher figshare collection journal article supplement (https://gsajournals.figshare.com/articles/dataset/_/6406598)
Supplement: Supplementary file 3 [file 1]

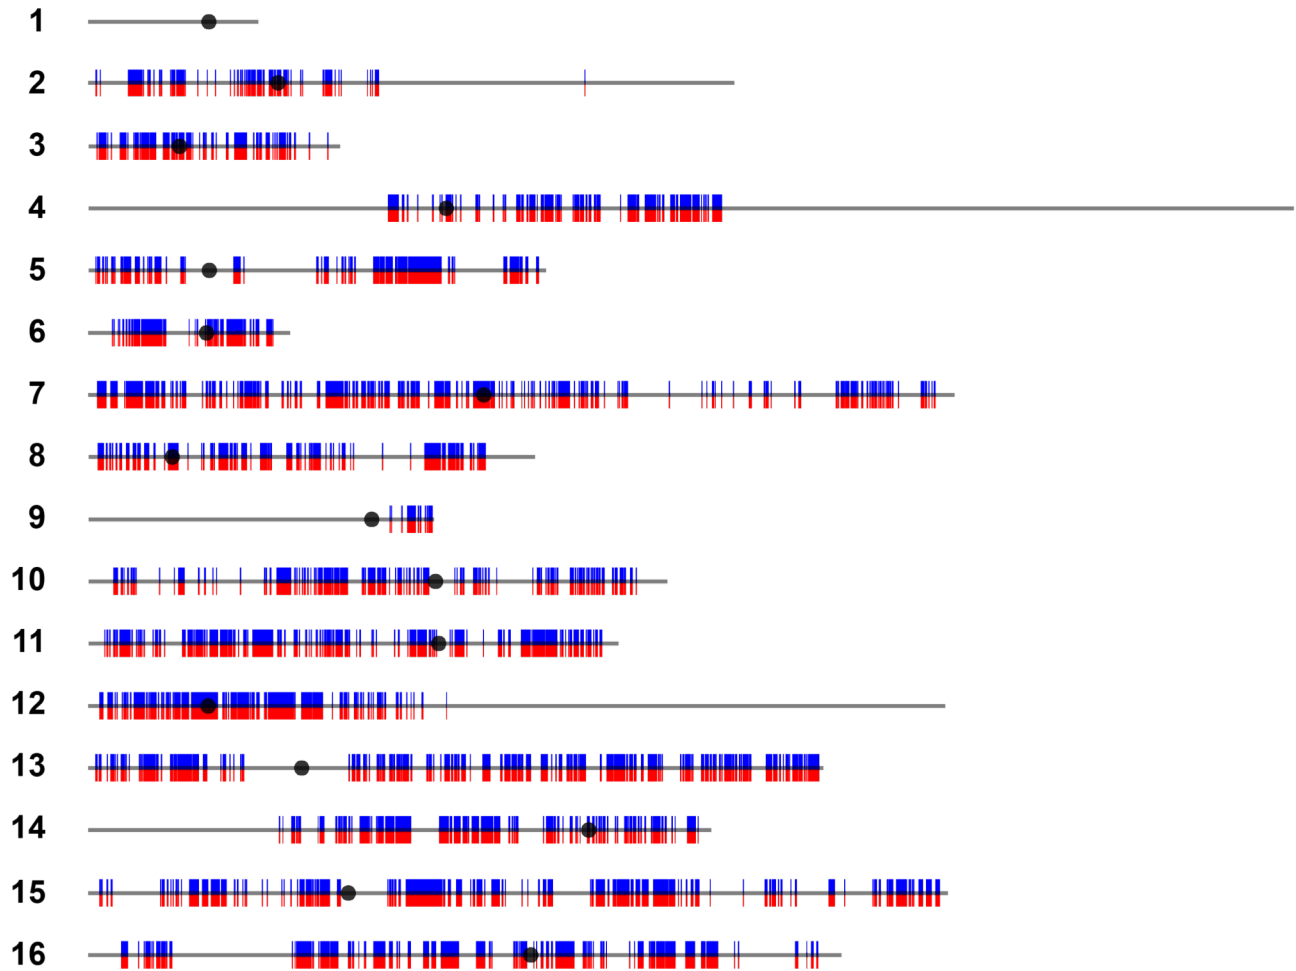

**Figure S1.** Draft map of heterozygosity in the JAY270 genome, showing the distribution of 12,023 phased heterozygous single nucleotide polymorphisms (HetSNPs; double colored markers, arbitrarily defined as paternal [blue] or maternal [red] haplotypes). Each horizontal line represents a *S. cerevisiae* chromosome. Black circles indicate the positions of the centromeres. The HetSNPs are unevenly distributed across the genome, with several regions showing evidence of ancestral LOH events that likely occurred in the JAY270 lineage. Plots were generated to scale in Python 2.7 using the matplotlib package and a custom script. For size reference, Chr1 is 230 Kb.
